# Supplementary material for: Enhanced electromagnetic absorption properties of the double-layer Ti3C2Tx MXene absorber with orthogonal microstructures
Source: Royal Society of Chemistry journal article supplement (doi:10.1039/d3tc03973k), 2024-01-01
Supplement: d3tc03973k1.pdf [file d3tc03973k1.pdf]

## Supplementary Material

### **Enhanced Electromagnetic Absorption Properties of the Double-Layer $Ti_3C_2T_x$ MXene Absorber with Orthogonal Microstructures**

*Yuanhao Ning<sup>1, 2</sup>, Shuang Yang<sup>1, 2</sup>, Xianxian Sun<sup>3</sup>, Shasha Wang<sup>1, 2</sup>, Lei Liang<sup>1, 2</sup>,  
Yuanjing Cheng<sup>1, 2</sup>, Ye Yuan<sup>3\*</sup> and Yibin Li<sup>1, 2, 3\*</sup>.*

<sup>1</sup> National Key Laboratory of Science and Technology on Advanced Composites in Special Environments, Harbin Institute of Technology, Harbin 150080, P. R. China

<sup>2</sup> Center for Composite Materials and Structures, Harbin Institute of Technology, Harbin 150080, P. R. China

<sup>3</sup> School of Materials Science and Engineering, Beihang University, Beijing 100081, P. R. China

**\*Corresponding author, e-mail:**

yuanyewins@hebut.edu.cn (Ye Yuan)

liyibin@hit.edu.cn (Yibin Li).

## **Supplementary Material:**

**Fig. S1.** Digital photo for  $\text{Ti}_3\text{C}_2\text{T}_x$  MXene foam.

**Fig. S2.** EDS of the  $\text{Ti}_3\text{C}_2\text{T}_x$  MXene foam.

**Fig. S3.** XRD pattern of  $\text{Ti}_3\text{AlC}_2$ ,  $\text{Ti}_3\text{C}_2\text{T}_x$ , and the  $\text{Ti}_3\text{C}_2\text{T}_x$  MXene foam.

**Fig. S4.** 1/4 wavelength matching model for (a) the perpendicular and (b) the parallel sample.

**Fig. S5.** Cole-Cole images of (a) the perpendicular and (b) the parallel sample.

**Fig. S6.**  $\varepsilon'' / f - \varepsilon'$  curves of (a) the perpendicular and (b) the parallel sample.

**Fig. S7.**  $\varepsilon'' - f^{-1}$  curves of (a) the perpendicular and (b) the parallel sample.

**Fig. S8** Electromagnetic wave reflection loss for the sample with the parallel end thickness of (a) 5%, (b) 10%, (c) 35%, (d) 40%, (e) 45%, (f) 50%, (g) 55%, (h) 60%, (i) 65%, (j) 70%, (k) 75%, (l) 80%, (m) 85%, (n) 90%, and (o) 95%, with electromagnetic wave incident from the parallel ends, separately.

**Table S1** Electromagnetic wave reflection loss for samples with electromagnetic waves incident from the parallel ends.

**Fig. S9** Electromagnetic wave reflection loss for the sample with the perpendicular end thickness of (a) 5%, (b) 10%, (c) 15%, (d) 20%, (e) 25%, (f) 30%, (g) 35%, (h) 40%, (i) 45%, (j) 50%, (k) 55%, (l) 60%, (m) 65%, (n) 70%, (o) 75%, (p) 80%, (q) 85%, (r) 90%, and (s) 95%, with electromagnetic wave incident from the perpendicular ends, separately.

**Table S2** Electromagnetic wave reflection loss for samples with electromagnetic waves incident from the perpendicular ends.

**Fig. S10** (a, c) Comparison of RL curves for single and double layer samples with the same thickness; (b, d) Comparison of RL curves for double-layer samples and their compositions, where parallel end thickness of 25% in (a, b) and 20% in (c, d).

**Table S3** Electromagnetic wave absorption properties of some earlier  $\text{Ti}_3\text{C}_2\text{T}_x$  MXene materials

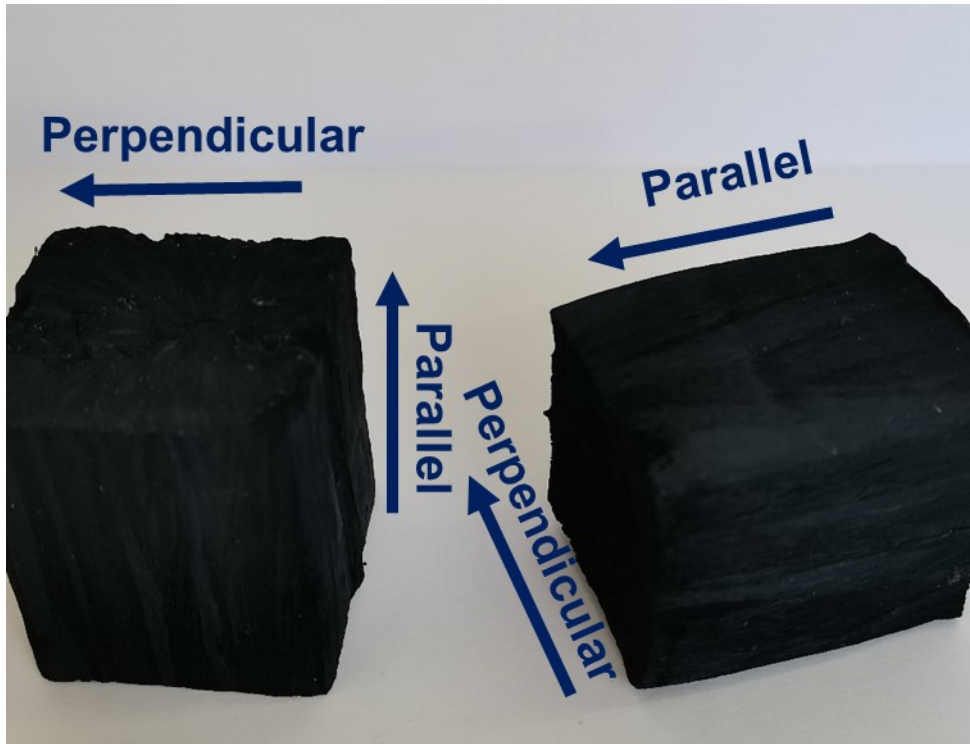

**Fig. S1** Digital photo of the Ti<sub>3</sub>C<sub>2</sub>T<sub>x</sub> MXene foam.

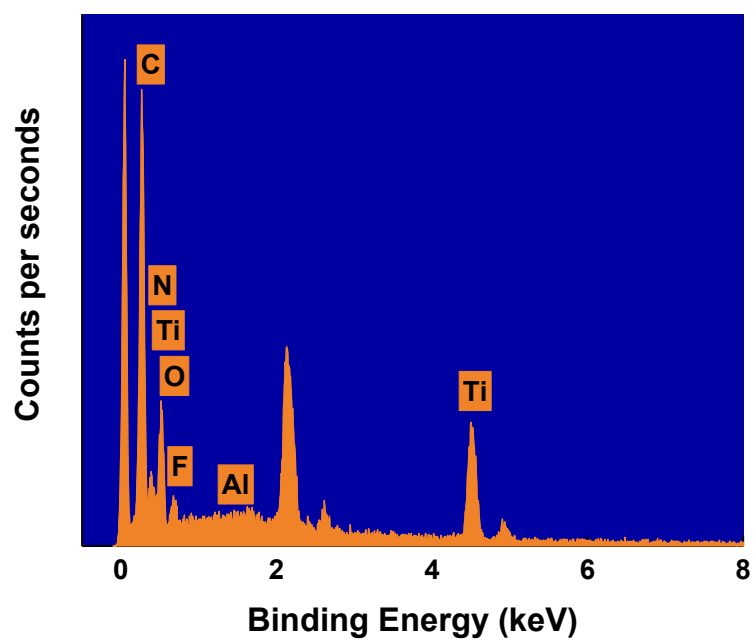

Fig. S2 EDS of the  $\text{Ti}_3\text{C}_2\text{T}_x$  MXene foam.

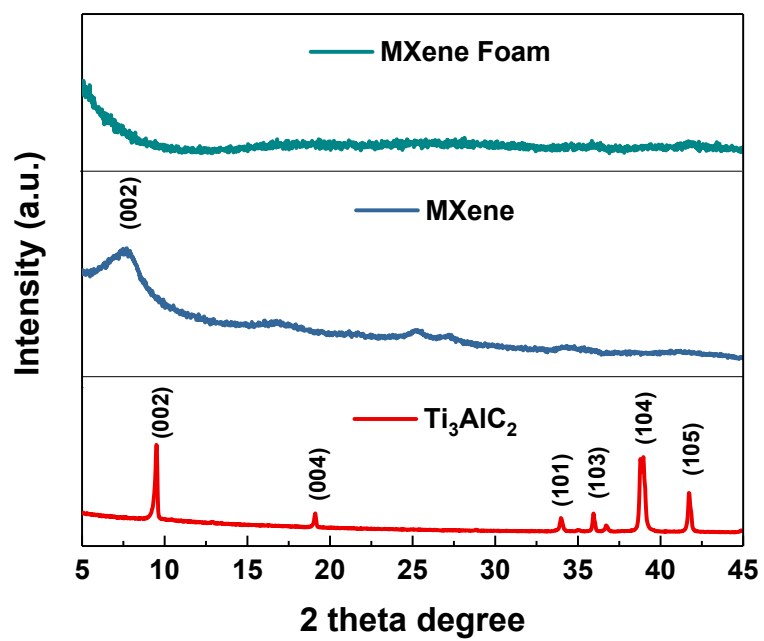

Fig. S3 XRD pattern of  $\text{Ti}_3\text{AlC}_2$ ,  $\text{Ti}_3\text{C}_2\text{T}_x$ , and the  $\text{Ti}_3\text{C}_2\text{T}_x$  MXene foam.

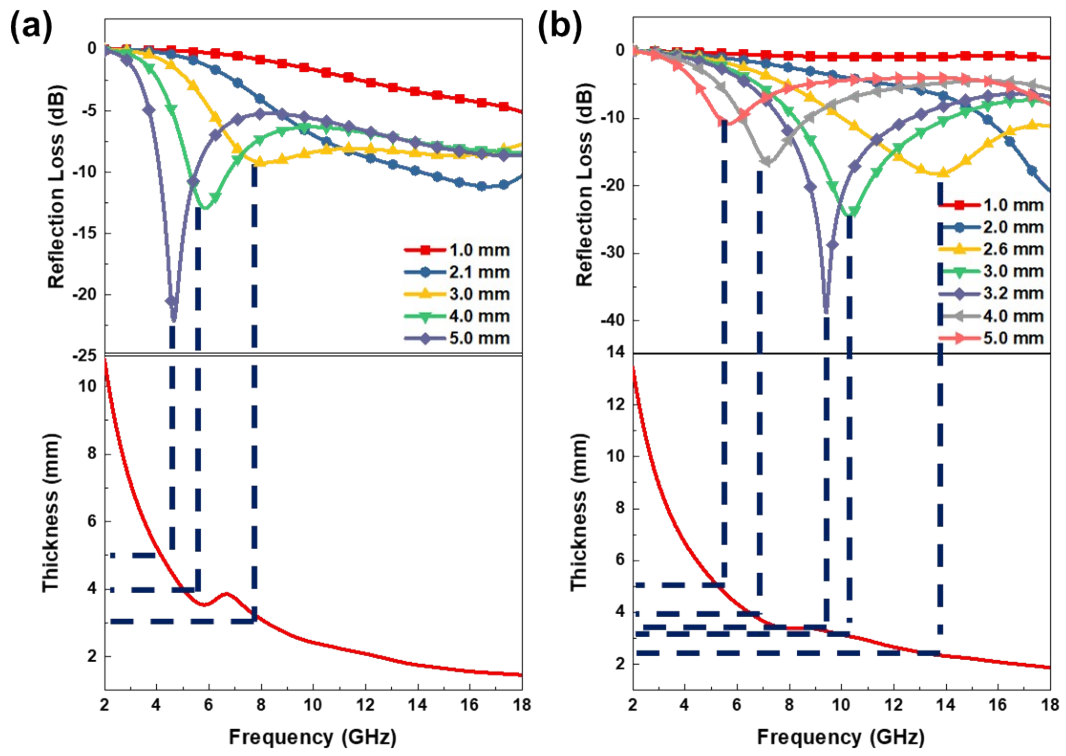

Fig. S4 1/4 wavelength matching model for (a) the perpendicular and (b) the parallel sample.

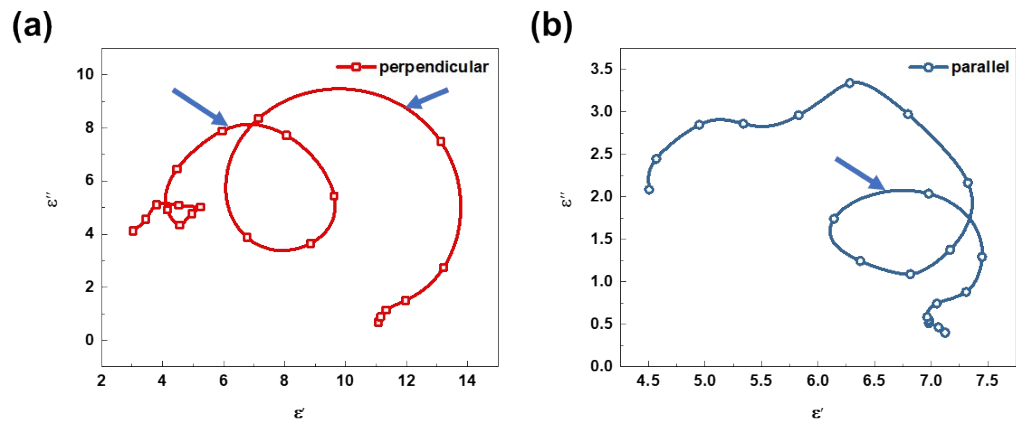

Fig. S5 Cole-Cole images of (a) the perpendicular and (b) the parallel sample.

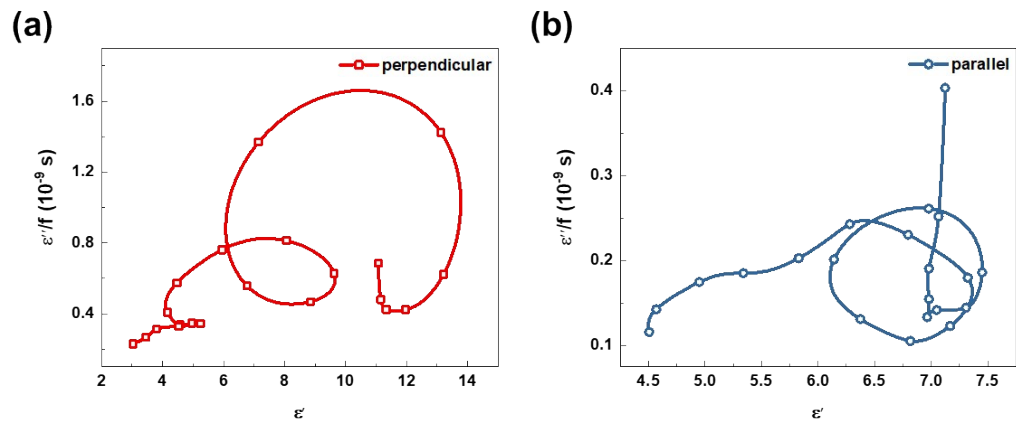

Fig. S6  $\varepsilon''/f - \varepsilon'$  curves of (a) the perpendicular and (b) the parallel sample.



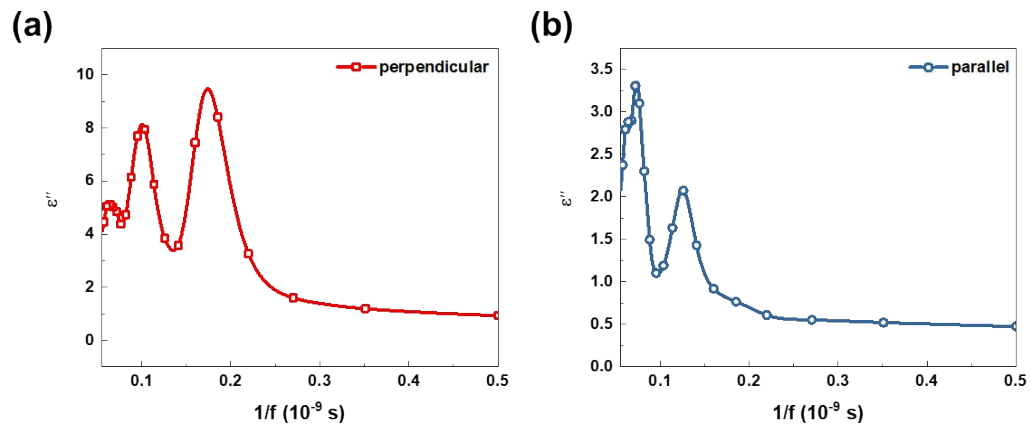

Fig. S7  $\epsilon'' - f^{-1}$  curves of (a) the perpendicular and (b) the parallel sample.

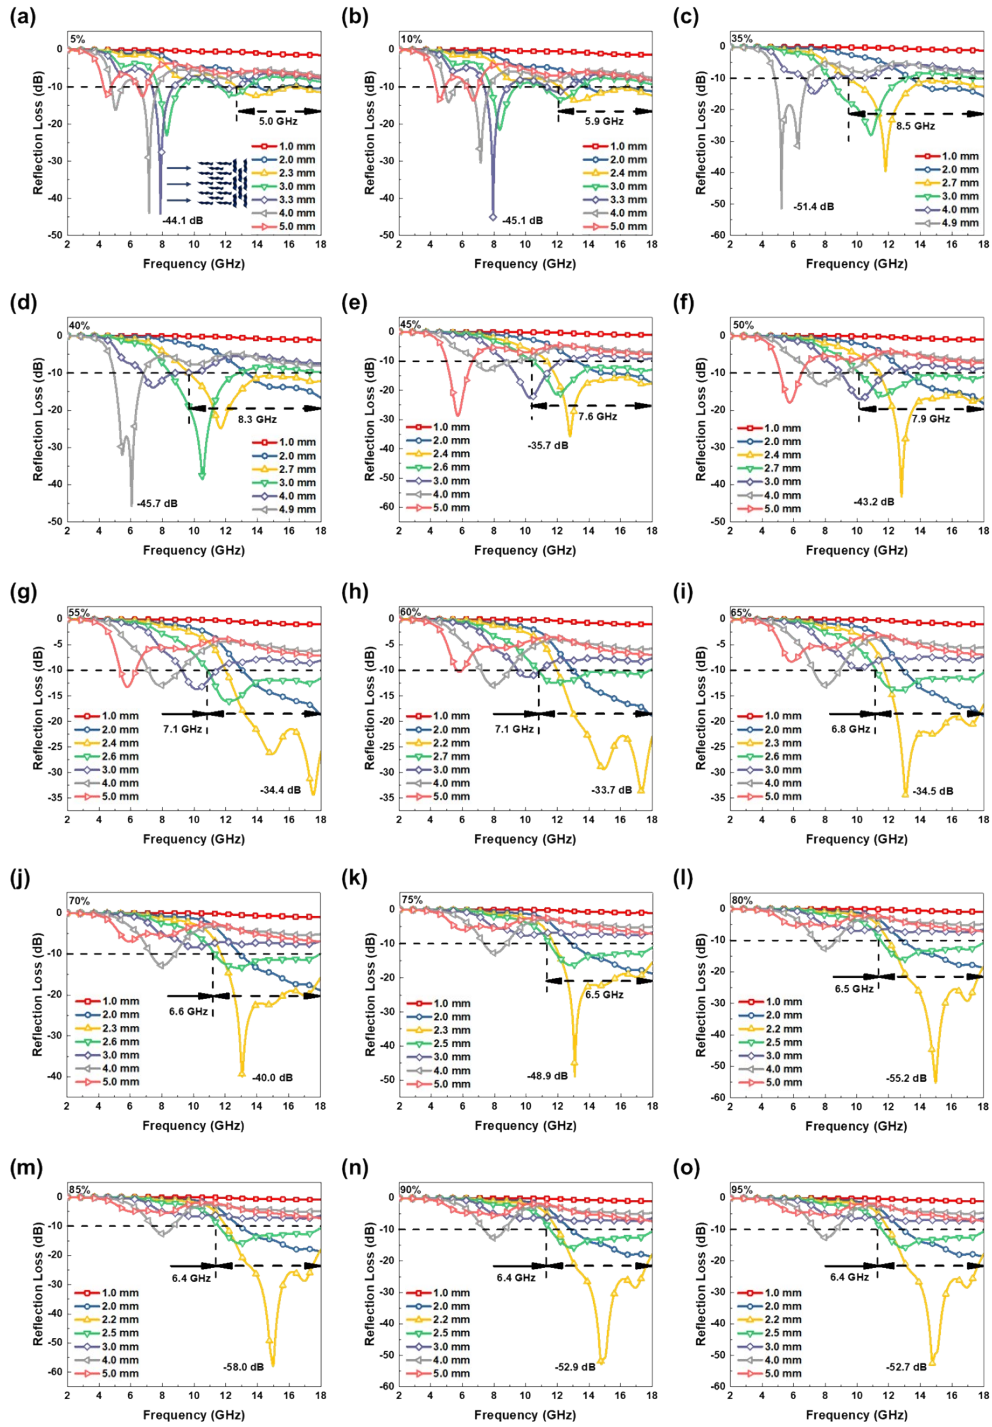

**Fig. S8** Electromagnetic wave reflection loss for the sample with the parallel end thickness of (a) 5%, (b) 10%, (c) 35%, (d) 40%, (e) 45%, (f) 50%, (g) 55%, (h) 60%, (i) 65%, (j) 70%, (k) 75%, (l) 80%, (m) 85%, (n) 90%, and (o) 95%, with electromagnetic wave incident from the parallel ends, separately.

**Table S1** Electromagnetic wave reflection loss for samples with electromagnetic waves incident from the parallel ends.

| Matching layer thickness ratio | RL <sub>min</sub> (dB) | Related Frequency of RL <sub>min</sub> (GHz) | Related Thickness of RL <sub>min</sub> (mm) | EAB <sub>max</sub> (GHz) | Related Thickness of EAB <sub>max</sub> (mm) |
|--------------------------------|------------------------|----------------------------------------------|---------------------------------------------|--------------------------|----------------------------------------------|
| 5%                             | -44.1                  | 7.9                                          | 3.3                                         | 5.0                      | 2.3                                          |
| 10%                            | -45.1                  | 7.9                                          | 3.3                                         | 5.9                      | 2.4                                          |
| 15%                            | -47.2                  | 8.0                                          | 3.3                                         | 7.0                      | 2.6                                          |
| 20%                            | -50.6                  | 8.1                                          | 3.3                                         | 9.4                      | 2.6                                          |
| 25%                            | -60.8                  | 6.6                                          | 4.6                                         | 9.1                      | 2.7                                          |
| 30%                            | -43.4                  | 6.5                                          | 4.7                                         | 8.8                      | 2.7                                          |
| 35%                            | -51.4                  | 5.2                                          | 4.9                                         | 8.5                      | 2.7                                          |
| 40%                            | -45.7                  | 6.1                                          | 4.9                                         | 8.3                      | 2.7                                          |
| 45%                            | -35.7                  | 12.8                                         | 2.4                                         | 7.6                      | 2.6                                          |
| 50%                            | -43.2                  | 12.8                                         | 2.4                                         | 7.9                      | 2.7                                          |
| 55%                            | -34.4                  | 17.5                                         | 2.4                                         | 7.1                      | 2.6                                          |
| 60%                            | -33.7                  | 17.3                                         | 2.2                                         | 7.1                      | 2.7                                          |
| 65%                            | -34.5                  | 13.1                                         | 2.3                                         | 6.8                      | 2.6                                          |
| 70%                            | -40.0                  | 13.1                                         | 2.3                                         | 6.6                      | 2.6                                          |
| 75%                            | -48.9                  | 13.1                                         | 2.3                                         | 6.5                      | 2.5                                          |
| 80%                            | -55.2                  | 15.0                                         | 2.2                                         | 6.5                      | 2.5                                          |
| 85%                            | -58.0                  | 15.0                                         | 2.2                                         | 6.4                      | 2.5                                          |
| 90%                            | -52.9                  | 14.8                                         | 2.2                                         | 6.4                      | 2.5                                          |
| 95%                            | -52.7                  | 14.8                                         | 2.2                                         | 6.4                      | 2.5                                          |

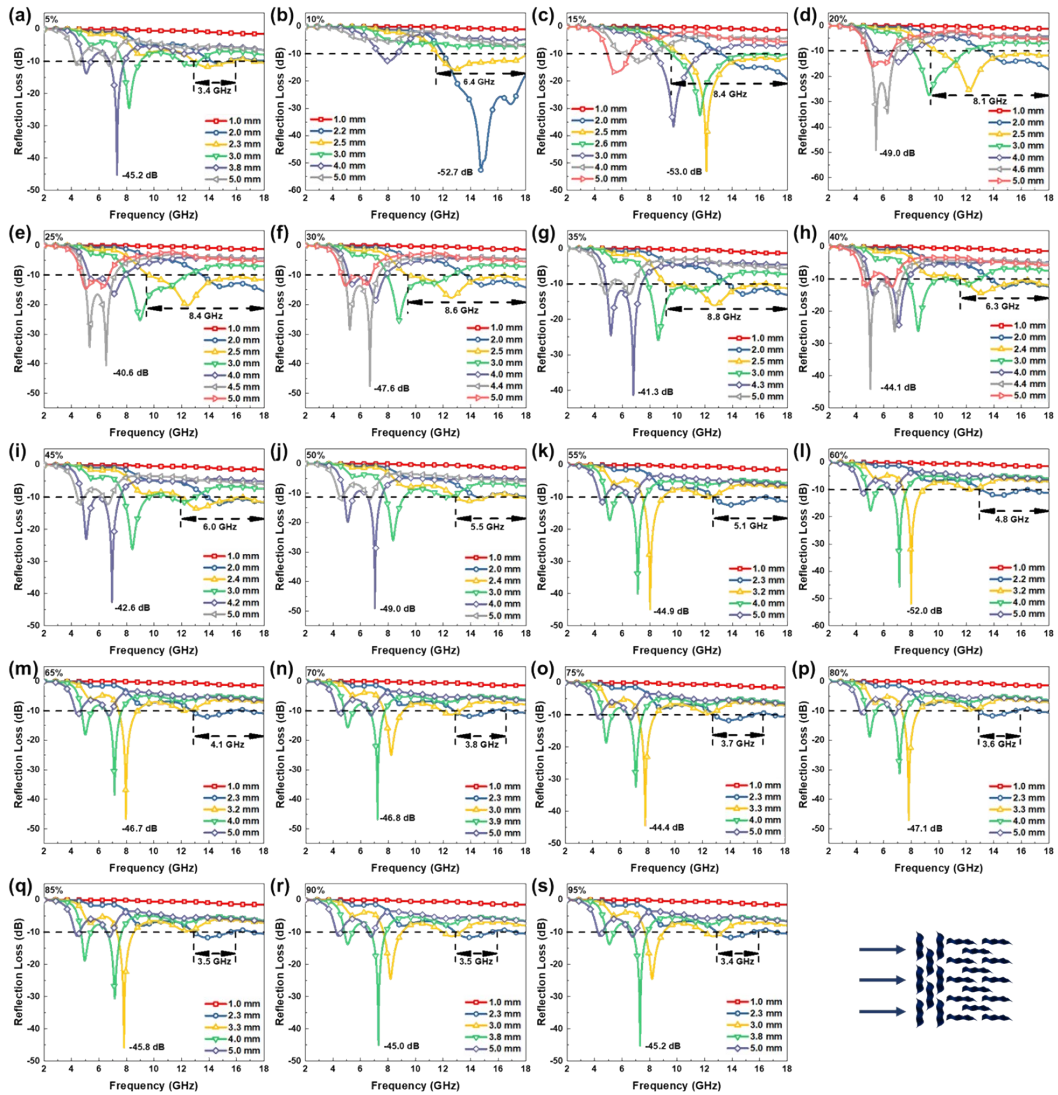

**Fig. S9** Electromagnetic wave reflection loss for the sample with the perpendicular end thickness of (a) 5%, (b) 10%, (c) 15%, (d) 20%, (e) 25%, (f) 30%, (g) 35%, (h) 40%, (i) 45%, (j) 50%, (k) 55%, (l) 60%, (m) 65%, (n) 70%, (o) 75%, (p) 80%, (q) 85%, (r) 90%, and (s) 95%, with electromagnetic wave incident from the perpendicular ends, separately.

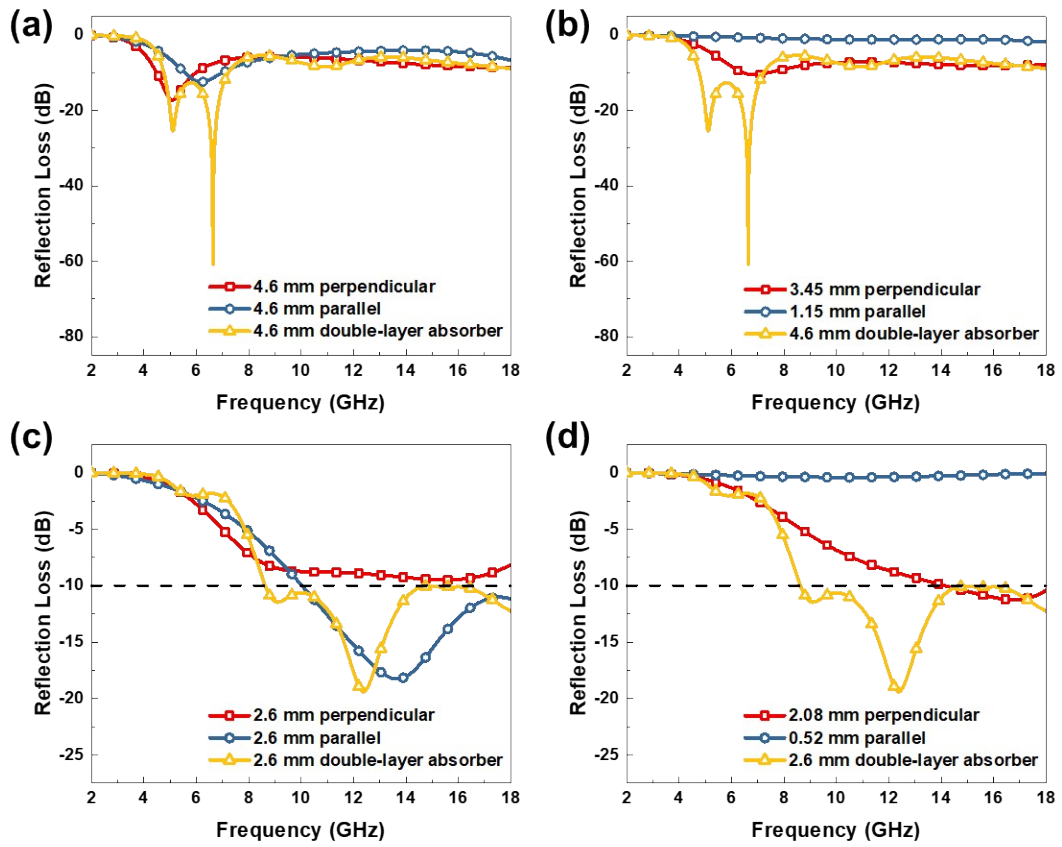

**Fig. S10** (a, c) Comparison of RL curves for single and double layer samples with the same thickness; (b, d) Comparison of RL curves for double-layer samples and their compositions, where parallel end thickness of 25% in (a, b) and 20% in (c, d).

**Table S2** Electromagnetic wave reflection loss for samples with electromagnetic waves incident from the perpendicular ends.

| Matching layer thickness ratio | RL <sub>min</sub> (dB) | Related Frequency of RL <sub>min</sub> (GHz) | Related Thickness of RL <sub>min</sub> (mm) | EAB <sub>max</sub> (GHz) | Related Thickness of EAB <sub>max</sub> (mm) |
|--------------------------------|------------------------|----------------------------------------------|---------------------------------------------|--------------------------|----------------------------------------------|
| 5%                             | -45.2                  | 7.3                                          | 3.8                                         | 3.4                      | 2.3                                          |
| 10%                            | -52.7                  | 14.8                                         | 2.2                                         | 6.4                      | 2.5                                          |
| 15%                            | -53.0                  | 12.1                                         | 2.5                                         | 8.4                      | 2.6                                          |
| 20%                            | -49.0                  | 5.5                                          | 4.6                                         | 8.1                      | 2.5                                          |
| 25%                            | -40.6                  | 6.5                                          | 4.5                                         | 8.4                      | 2.5                                          |
| 30%                            | -47.6                  | 6.7                                          | 4.4                                         | 8.6                      | 2.5                                          |
| 35%                            | -41.3                  | 6.8                                          | 4.3                                         | 8.8                      | 2.5                                          |
| 40%                            | -44.1                  | 5.0                                          | 4.4                                         | 6.3                      | 2.4                                          |
| 45%                            | -42.6                  | 7.0                                          | 4.2                                         | 6.0                      | 2.4                                          |
| 50%                            | -49.0                  | 7.0                                          | 4.0                                         | 5.5                      | 2.4                                          |
| 55%                            | -44.9                  | 8.0                                          | 3.2                                         | 5.1                      | 2.3                                          |
| 60%                            | -52.0                  | 8.0                                          | 3.2                                         | 4.8                      | 2.2                                          |
| 65%                            | -46.7                  | 8.0                                          | 3.2                                         | 4.1                      | 2.3                                          |
| 70%                            | -46.8                  | 7.2                                          | 3.9                                         | 3.8                      | 2.3                                          |
| 75%                            | -44.4                  | 7.8                                          | 3.3                                         | 3.7                      | 2.3                                          |
| 80%                            | -47.1                  | 7.8                                          | 3.3                                         | 3.6                      | 2.3                                          |
| 85%                            | -45.8                  | 7.8                                          | 3.3                                         | 3.5                      | 2.3                                          |
| 90%                            | -45.0                  | 7.3                                          | 3.8                                         | 3.5                      | 2.3                                          |
| 95%                            | -45.2                  | 7.3                                          | 3.8                                         | 3.4                      | 2.3                                          |

**Table S3** Electromagnetic wave absorption properties of some earlier  $\text{Ti}_3\text{C}_2\text{T}_x$  MXene materials

| Samples                                                                                            | $\text{RL}_{\min}$ (dB) | $\text{EAB}_{\max}$ (GHz) | References |
|----------------------------------------------------------------------------------------------------|-------------------------|---------------------------|------------|
| $\text{Ti}_3\text{C}_2\text{T}_x$ MXenes without delamination                                      | $\sim -7$               | 0                         | 11         |
| DMF delaminated $\text{Ti}_3\text{C}_2\text{T}_x$ MXenes                                           | -41.9                   | $\sim 2.8$                | 12         |
| Ethyl alcohol delaminated $\text{Ti}_3\text{C}_2\text{T}_x$ MXene                                  | -17.0                   | 5.6                       | 13         |
| $\text{Ti}_3\text{C}_2\text{T}_x$ MXenes with Modified Surface                                     | -48.4                   | 2.8                       | 14         |
| Urchin-like ZnO- $\text{Ti}_3\text{C}_2\text{T}_x$ MXene                                           | -26.3                   | 1.4                       | 15         |
| 3D PMMA@MXene@Ni <sup>2+</sup>                                                                     | -59.6                   | 4.5                       | 16         |
| Sea urchin-like $\text{Ti}_3\text{C}_2\text{T}_x$ MXene@ZnO hollow spheres                         | -57.4                   | 6.6                       | 17         |
| $\text{Ti}_3\text{C}_2\text{T}_x$ MXene@rGO aerogel                                                | -31.2                   | 5.4                       | 18         |
| $\text{Ti}_3\text{C}_2\text{T}_x$ MXene cellulose aerogel                                          | -43.4                   | 4.5                       | 19         |
| $\text{Ti}_3\text{C}_2\text{T}_x$ MXene/SiCnws lamellar foam                                       | -55.7                   | 4.5                       | 20         |
| $\text{Ti}_3\text{C}_2\text{T}_x$ MXene/PI aerogel                                                 | -41.8                   | 6.5                       | 21         |
| Ni/ $\text{Ti}_3\text{C}_2\text{T}_x$ MXene/rGO aerogel                                            | -75.2                   | 7.3                       | 22         |
| $\text{Ti}_3\text{C}_2\text{T}_x$ MXene double-layer absorber with matching layer thickness of 20% | -50.6                   | 9.4                       | This work  |
| $\text{Ti}_3\text{C}_2\text{T}_x$ MXene double-layer absorber with matching layer thickness of 25% | -60.8                   | 9.1                       | This work  |

## References

1. Y. Zhang, Y. Huang, T. Zhang, H. Chang, P. Xiao, H. Chen, Z. Huang and Y. Chen, *Advanced Materials*, 2015, 27, 2049-2053.
2. X. Li, X. Yin, H. Xu, M. Han, M. Li, S. Liang, L. Cheng and L. Zhang, *Acs Applied Materials & Interfaces*, 2018, 10, 34524-34533.
3. M. Naguib, M. Kurtoglu, V. Presser, J. Lu, J. Niu, M. Heon, L. Hultman, Y. Gogotsi and M. W. Barsoum, *Advanced Materials*, 2011, 23, 4248-4253.
4. J. Zhang, N. Kong, S. Uzun, A. Levitt, S. Seyedin, P. A. Lynch, S. Qin, M. Han, W. Yang, J. Liu, X. Wang, Y. Gogotsi and J. M. Razal, *Advanced Materials*, 2020, 32.
5. S. Zhao, H.-B. Zhang, J.-Q. Luo, Q.-W. Wang, B. Xu, S. Hong and Z.-Z. Yu, *Acs Nano*, 2018, 12, 11193-11202.
6. Z. Wu, T. Shang, Y. Deng, Y. Tao and Q.-H. Yang, *Advanced Science*, 2020, 7.
7. B. Anasori, M. R. Lukatskaya and Y. Gogotsi, *Nature Reviews Materials*, 2017, 2.
8. M. Ghidui, M. R. Lukatskaya, M.-Q. Zhao, Y. Gogotsi and M. W. Barsoum, *Nature*, 2014, 516, 78-U171.
9. G. Wang, X. Peng, L. Yu, G. Wan, S. Lin and Y. Qin, *Journal of Materials Chemistry A*, 2015, 3, 2734-2740.
10. Z. Cheng, Y. Cao, R. Wang, L. Xia, S. Ma, Z. Li, Z. Cai, Z. Zhang and Y. Huang, *Carbon*, 2021, 185, 669-680.
11. M. Han, X. Yin, X. Li, B. Anasori, L. Zhang, L. Cheng and Y. Gogotsi, *Acs Applied Materials & Interfaces*, 2017, 9, 20038-20045.
12. G. Xu, X. Wang, S. Gong, S. Wei, J. Liu and Y. Xu, *Nanotechnology*, 2018, 29.
13. Y. Qing, W. Zhou, F. Luo and D. Zhu, *Ceramics International*, 2016, 42, 16412-16416.



14. M. Han, X. Yin, H. Wu, Z. Hou, C. Song, X. Li, L. Zhang and L. Cheng, *Acs Applied Materials & Interfaces*, 2016, 8, 21011-21019.
15. Y. Qian, H. Wei, J. Dong, Y. Du, X. Fang, W. Zheng, Y. Sun and Z. Jiang, *Ceramics International*, 2017, 43, 10757-10762.
16. C. Wen, X. Li, R. Zhang, C. Xu, W. You, Z. Liu, B. Zhao and R. Che, *Acs Nano*, 2022, 16, 1150-1159.
17. Y.-Q. Wang, H.-B. Zhao, J.-B. Cheng, B.-W. Liu, Q. Fu and Y.-Z. Wang, *Nano-Micro Letters*, 2022, 14.
18. L. Wang, H. Liu, X. Lv, G. Cui and G. Gu, *Journal of Alloys and Compounds*, 2020, 828.
19. Y. Jiang, X. Xie, Y. Chen, Y. Liu, R. Yang and G. Sui, *Journal of Materials Chemistry C*, 2018, 6, 8679-8687.
20. X. Li, X. Yin, H. Xu, M. Han, M. Li, S. Liang, L. Cheng and L. Zhang, *Acs Applied Materials & Interfaces*, 2018, 10, 34524-34533.
21. Y. Dai, X. Wu, Z. Liu, H.-B. Zhang and Z.-Z. Yu, *Composites Part B-Engineering*, 2020, 200.
22. L. Liang, Q. Li, X. Yan, Y. Feng, Y. Wang, H.-B. Zhang, X. Zhou, C. Liu, C. Shen and X. Xie, *Acs Nano*, 2021, 15, 6622-6632.
